# Supplementary material for: Dissolution and oriented aggregation: transformation from lepidorocite to goethite by the catalysis of aqueous Fe(ii)
Source: Royal Society of Chemistry journal article supplement (doi:10.1039/c5ra19787b), 2015-01-01
Supplement: c5ra19787b1.pdf [file c5ra19787b1.pdf]

**Dissolution and oriented aggregation: transformation from lepidocrocite to goethite by the catalysis of aqueous Fe (II)**

Wenjing Yan<sup>a,d</sup>, Hui Liu<sup>b,c</sup>, Rufen Chen<sup>b,c</sup>, Juan Xie<sup>d</sup> and Yu Wei<sup>b,c\*</sup>

a. College of Physics Science and Information Engineering, Hebei Normal University, Shijiazhuang 050024, China.

b. College of Chemistry and Material Science, Hebei Normal University, Shijiazhuang 050024, China.

c. Key Laboratory of Inorganic Nanomaterial of Hebei Province, Hebei Normal University, Shijiazhuang 050016, China.

d. College of Science, Hebei University of Engineering, Handan 056038, China.

e. Hebei Chemical and Pharmaceutical College, Shijiazhuang 050026, China.

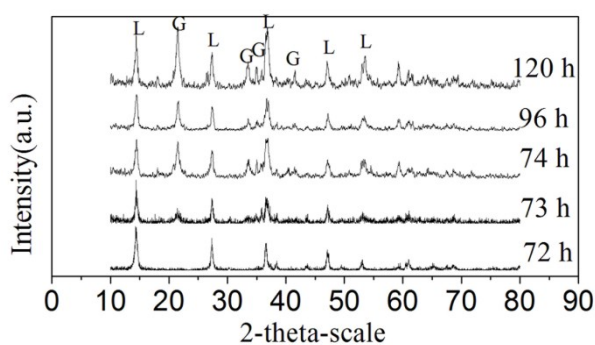

Fig. S1 XRD patterns of lepidocrocite aged with  $R = 0.02$  for 72, 73, 74, 96, 120 h; L: Lepidocrocite; G: Goethite.

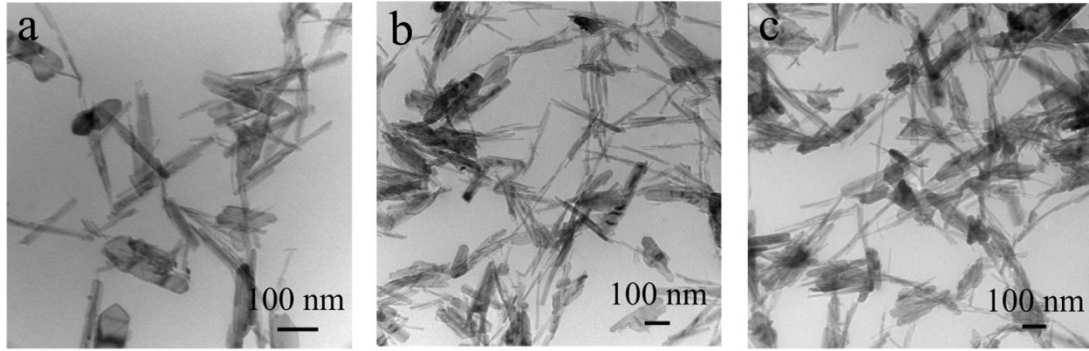

Fig. S2 TEM images of lepidocrocite aged with  $R = 0.02$  for ( a)73 ,(b) 74,(c) 96 h.

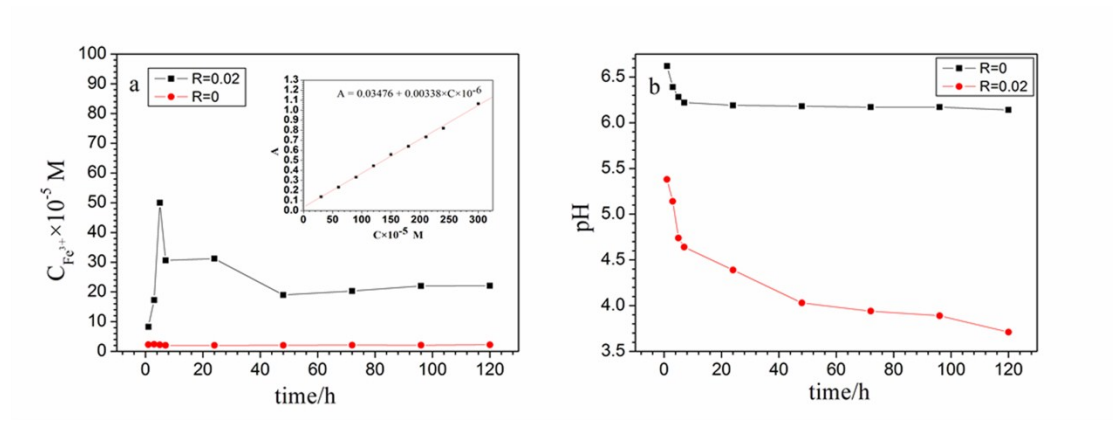

Fig. S3 (a) The concentration of Fe(III) ions when lepidocrocite aged with  $R = 0$  and aged with  $R = 0.02$ ; (b) The pH of lepidocrocite aged with  $R = 0$  and aged with  $R = 0.02$ .
